# Supplementary material for: Novel biopesticide based on a spider venom peptide shows no adverse effects on honeybees
Source: PubMed Central journal article supplement (PMC4071547; doi:10.1098/rspb.2014.0619), 2014-07-22
Supplement: rspb20140619supp1.pdf [file rspb20140619supp1.pdf]

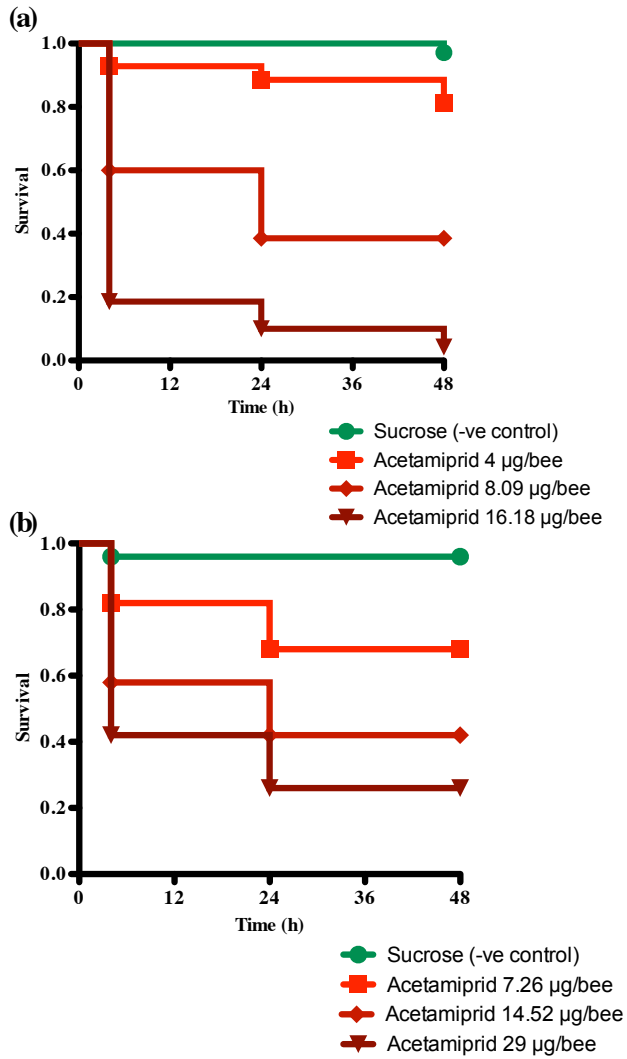

ESM Figure 1:

Dose response for the insecticide acetamiprid for a) acute contact toxicity (4, 8.09 and 16.18 µg/bee) and, b) acute oral toxicity (7.26, 14.52 and 29 µg/bee). The intermediate dose tested for both assays represents the published LD50 value for the pesticides for bees (EU, SANCO/1392/2001). These LD50 values were confirmed in the present study.
