# Supplementary material for: Novel biopesticide based on a spider venom peptide shows no adverse effects on honeybees
Source: PubMed Central journal article supplement (PMC4071547; doi:10.1098/rspb.2014.0619), 2014-07-22
Supplement: rspb20140619supp2.pdf [file rspb20140619supp2.pdf]

| id | trt | trialno | response | learning chronic 350ppm restructured |
|----|-----|---------|----------|--------------------------------------|
| 1  | 1   | 1       | 1        | 0                                    |
| 1  | 1   | 1       | 2        | 1                                    |
| 1  | 1   | 1       | 3        | 1 trt                                |
| 1  | 1   | 1       | 4        | 1                                    |
| 1  | 1   | 1       | 5        | 1                                    |
| 1  | 1   | 1       | 6        | 1                                    |
| 2  | 1   | 1       | 1        | 0                                    |
| 2  | 1   | 1       | 2        | 0                                    |
| 2  | 1   | 1       | 3        | 0                                    |
| 2  | 1   | 1       | 4        | 0                                    |
| 2  | 1   | 1       | 5        | 1                                    |
| 2  | 1   | 1       | 6        | 1                                    |
| 3  | 1   | 1       | 1        | 0                                    |
| 3  | 1   | 1       | 2        | 1                                    |
| 3  | 1   | 1       | 3        | 1                                    |
| 3  | 1   | 1       | 4        | 1                                    |
| 3  | 1   | 1       | 5        | 1                                    |
| 3  | 1   | 1       | 6        | 1                                    |
| 4  | 1   | 1       | 1        | 0                                    |
| 4  | 1   | 1       | 2        | 1                                    |
| 4  | 1   | 1       | 3        | 1                                    |
| 4  | 1   | 1       | 4        | 1                                    |
| 4  | 1   | 1       | 5        | 1                                    |
| 4  | 1   | 1       | 6        | 1                                    |
| 5  | 1   | 1       | 1        | 0                                    |
| 5  | 1   | 1       | 2        | 0                                    |
| 5  | 1   | 1       | 3        | 1                                    |
| 5  | 1   | 1       | 4        | 1                                    |
| 5  | 1   | 1       | 5        | 1                                    |
| 5  | 1   | 1       | 6        | 1                                    |
| 6  | 1   | 1       | 1        | 0                                    |
| 6  | 1   | 1       | 2        | 1                                    |
| 6  | 1   | 1       | 3        | 1                                    |
| 6  | 1   | 1       | 4        | 1                                    |
| 6  | 1   | 1       | 5        | 1                                    |
| 6  | 1   | 1       | 6        | 1                                    |
| 7  | 1   | 1       | 1        | 0                                    |
| 7  | 1   | 1       | 2        | 0                                    |
| 7  | 1   | 1       | 3        | 1                                    |
| 7  | 1   | 1       | 4        | 1                                    |
| 7  | 1   | 1       | 5        | 0                                    |
| 7  | 1   | 1       | 6        | 1                                    |
| 8  | 1   | 1       | 1        | 0                                    |
| 8  | 1   | 1       | 2        | 1                                    |
| 8  | 1   | 1       | 3        | 1                                    |
| 8  | 1   | 1       | 4        | 1                                    |
| 8  | 1   | 1       | 5        | 1                                    |
| 8  | 1   | 1       | 6        | 1                                    |
| 9  | 1   | 1       | 1        | 0                                    |
| 9  | 1   | 1       | 2        | 0                                    |
| 9  | 1   | 1       | 3        | 1                                    |
| 9  | 1   | 1       | 4        | 0                                    |
| 9  | 1   | 1       | 5        | 0                                    |
| 9  | 1   | 1       | 6        | 0                                    |
| 10 | 1   | 1       | 1        | 0                                    |
| 10 | 1   | 1       | 2        | 0                                    |
| 10 | 1   | 1       | 3        | 0                                    |
| 10 | 1   | 1       | 4        | 1                                    |
| 10 | 1   | 1       | 5        | 1                                    |
| 10 | 1   | 1       | 6        | 0                                    |
| 11 | 2   | 2       | 1        | 0                                    |
| 11 | 2   | 2       | 2        | 0                                    |
| 11 | 2   | 2       | 3        | 0                                    |

7 day feeding expt

1 = sucrose only control

2 = 350 ppm Hv1a/GNA

1 trialno = training trials of learning expt, 1-6

0 response = did bee perform proboscis extension?

0 1 = yes

1 0 = no

|    |   |   |   |
|----|---|---|---|
| 11 | 2 | 4 | 1 |
| 11 | 2 | 5 | 1 |
| 11 | 2 | 6 | 1 |
| 12 | 2 | 1 | 0 |
| 12 | 2 | 2 | 1 |
| 12 | 2 | 3 | 0 |
| 12 | 2 | 4 | 0 |
| 12 | 2 | 5 | 1 |
| 12 | 2 | 6 | 1 |
| 13 | 2 | 1 | 0 |
| 13 | 2 | 2 | 1 |
| 13 | 2 | 3 | 1 |
| 13 | 2 | 4 | 1 |
| 13 | 2 | 5 | 1 |
| 13 | 2 | 6 | 1 |
| 14 | 2 | 1 | 0 |
| 14 | 2 | 2 | 0 |
| 14 | 2 | 3 | 1 |
| 14 | 2 | 4 | 1 |
| 14 | 2 | 5 | 1 |
| 14 | 2 | 6 | 1 |
| 15 | 2 | 1 | 0 |
| 15 | 2 | 2 | 1 |
| 15 | 2 | 3 | 1 |
| 15 | 2 | 4 | 1 |
| 15 | 2 | 5 | 1 |
| 15 | 2 | 6 | 1 |
| 16 | 2 | 1 | 0 |
| 16 | 2 | 2 | 1 |
| 16 | 2 | 3 | 1 |
| 16 | 2 | 4 | 1 |
| 16 | 2 | 5 | 1 |
| 16 | 2 | 6 | 1 |
| 17 | 2 | 1 | 0 |
| 17 | 2 | 2 | 1 |
| 17 | 2 | 3 | 1 |
| 17 | 2 | 4 | 1 |
| 17 | 2 | 5 | 1 |
| 17 | 2 | 6 | 1 |
| 18 | 2 | 1 | 0 |
| 18 | 2 | 2 | 1 |
| 18 | 2 | 3 | 1 |
| 18 | 2 | 4 | 1 |
| 18 | 2 | 5 | 0 |
| 18 | 2 | 6 | 1 |
| 19 | 1 | 1 | 0 |
| 19 | 1 | 2 | 1 |
| 19 | 1 | 3 | 1 |
| 19 | 1 | 4 | 0 |
| 19 | 1 | 5 | 1 |
| 19 | 1 | 6 | 1 |
| 20 | 1 | 1 | 0 |
| 20 | 1 | 2 | 0 |
| 20 | 1 | 3 | 0 |
| 20 | 1 | 4 | 1 |
| 20 | 1 | 5 | 1 |
| 20 | 1 | 6 | 0 |
| 21 | 1 | 1 | 0 |
| 21 | 1 | 2 | 0 |
| 21 | 1 | 3 | 1 |
| 21 | 1 | 4 | 1 |
| 21 | 1 | 5 | 1 |
| 21 | 1 | 6 | 1 |
| 22 | 1 | 1 | 0 |

|    |   |   |   |
|----|---|---|---|
| 22 | 1 | 2 | 1 |
| 22 | 1 | 3 | 0 |
| 22 | 1 | 4 | 0 |
| 22 | 1 | 5 | 0 |
| 22 | 1 | 6 | 0 |
| 23 | 1 | 1 | 0 |
| 23 | 1 | 2 | 0 |
| 23 | 1 | 3 | 0 |
| 23 | 1 | 4 | 0 |
| 23 | 1 | 5 | 0 |
| 23 | 1 | 6 | 1 |
| 24 | 1 | 1 | 0 |
| 24 | 1 | 2 | 1 |
| 24 | 1 | 3 | 1 |
| 24 | 1 | 4 | 1 |
| 24 | 1 | 5 | 0 |
| 24 | 1 | 6 | 0 |
| 25 | 1 | 1 | 0 |
| 25 | 1 | 2 | 0 |
| 25 | 1 | 3 | 1 |
| 25 | 1 | 4 | 1 |
| 25 | 1 | 5 | 1 |
| 25 | 1 | 6 | 1 |
| 26 | 1 | 1 | 0 |
| 26 | 1 | 2 | 0 |
| 26 | 1 | 3 | 1 |
| 26 | 1 | 4 | 1 |
| 26 | 1 | 5 | 1 |
| 26 | 1 | 6 | 1 |
| 27 | 1 | 1 | 0 |
| 27 | 1 | 2 | 1 |
| 27 | 1 | 3 | 1 |
| 27 | 1 | 4 | 0 |
| 27 | 1 | 5 | 1 |
| 27 | 1 | 6 | 1 |
| 28 | 2 | 1 | 0 |
| 28 | 2 | 2 | 0 |
| 28 | 2 | 3 | 1 |
| 28 | 2 | 4 | 0 |
| 28 | 2 | 5 | 1 |
| 28 | 2 | 6 | 1 |
| 29 | 2 | 1 | 0 |
| 29 | 2 | 2 | 1 |
| 29 | 2 | 3 | 0 |
| 29 | 2 | 4 | 1 |
| 29 | 2 | 5 | 0 |
| 29 | 2 | 6 | 0 |
| 30 | 2 | 1 | 0 |
| 30 | 2 | 2 | 0 |
| 30 | 2 | 3 | 1 |
| 30 | 2 | 4 | 1 |
| 30 | 2 | 5 | 1 |
| 30 | 2 | 6 | 1 |
| 31 | 2 | 1 | 0 |
| 31 | 2 | 2 | 1 |
| 31 | 2 | 3 | 1 |
| 31 | 2 | 4 | 1 |
| 31 | 2 | 5 | 1 |
| 31 | 2 | 6 | 1 |
| 32 | 2 | 1 | 0 |
| 32 | 2 | 2 | 0 |
| 32 | 2 | 3 | 0 |
| 32 | 2 | 4 | 1 |
| 32 | 2 | 5 | 0 |

|    |   |   |   |
|----|---|---|---|
| 32 | 2 | 6 | 0 |
| 33 | 2 | 1 | 0 |
| 33 | 2 | 2 | 1 |
| 33 | 2 | 3 | 1 |
| 33 | 2 | 4 | 0 |
| 33 | 2 | 5 | 1 |
| 33 | 2 | 6 | 1 |
| 34 | 1 | 1 | 0 |
| 34 | 1 | 2 | 0 |
| 34 | 1 | 3 | 0 |
| 34 | 1 | 4 | 0 |
| 34 | 1 | 5 | 1 |
| 34 | 1 | 6 | 1 |
| 35 | 1 | 1 | 0 |
| 35 | 1 | 2 | 0 |
| 35 | 1 | 3 | 0 |
| 35 | 1 | 4 | 0 |
| 35 | 1 | 5 | 1 |
| 35 | 1 | 6 | 1 |
| 36 | 1 | 1 | 0 |
| 36 | 1 | 2 | 1 |
| 36 | 1 | 3 | 1 |
| 36 | 1 | 4 | 1 |
| 36 | 1 | 5 | 1 |
| 36 | 1 | 6 | 1 |
| 37 | 1 | 1 | 0 |
| 37 | 1 | 2 | 0 |
| 37 | 1 | 3 | 0 |
| 37 | 1 | 4 | 1 |
| 37 | 1 | 5 | 1 |
| 37 | 1 | 6 | 1 |
| 38 | 1 | 1 | 0 |
| 38 | 1 | 2 | 1 |
| 38 | 1 | 3 | 1 |
| 38 | 1 | 4 | 1 |
| 38 | 1 | 5 | 1 |
| 38 | 1 | 6 | 1 |
| 39 | 1 | 1 | 0 |
| 39 | 1 | 2 | 0 |
| 39 | 1 | 3 | 0 |
| 39 | 1 | 4 | 1 |
| 39 | 1 | 5 | 0 |
| 39 | 1 | 6 | 0 |
| 40 | 1 | 1 | 0 |
| 40 | 1 | 2 | 0 |
| 40 | 1 | 3 | 1 |
| 40 | 1 | 4 | 1 |
| 40 | 1 | 5 | 1 |
| 40 | 1 | 6 | 1 |
| 41 | 2 | 1 | 0 |
| 41 | 2 | 2 | 0 |
| 41 | 2 | 3 | 0 |
| 41 | 2 | 4 | 1 |
| 41 | 2 | 5 | 1 |
| 41 | 2 | 6 | 1 |
| 42 | 2 | 1 | 0 |
| 42 | 2 | 2 | 0 |
| 42 | 2 | 3 | 0 |
| 42 | 2 | 4 | 0 |
| 42 | 2 | 5 | 1 |
| 42 | 2 | 6 | 1 |
| 43 | 2 | 1 | 0 |
| 43 | 2 | 2 | 0 |
| 43 | 2 | 3 | 1 |

|    |   |   |   |
|----|---|---|---|
| 43 | 2 | 4 | 1 |
| 43 | 2 | 5 | 1 |
| 43 | 2 | 6 | 1 |
| 44 | 2 | 1 | 0 |
| 44 | 2 | 2 | 1 |
| 44 | 2 | 3 | 1 |
| 44 | 2 | 4 | 1 |
| 44 | 2 | 5 | 1 |
| 44 | 2 | 6 | 1 |
| 45 | 2 | 1 | 0 |
| 45 | 2 | 2 | 0 |
| 45 | 2 | 3 | 1 |
| 45 | 2 | 4 | 1 |
| 45 | 2 | 5 | 1 |
| 45 | 2 | 6 | 1 |
| 46 | 2 | 1 | 0 |
| 46 | 2 | 2 | 0 |
| 46 | 2 | 3 | 1 |
| 46 | 2 | 4 | 1 |
| 46 | 2 | 5 | 1 |
| 46 | 2 | 6 | 1 |

| trt | resp | time | odour | memory chronic 350ppm restructured                |
|-----|------|------|-------|---------------------------------------------------|
|     | 1    | 1    | 2     | 1                                                 |
|     | 1    | 1    | 2     | 1                                                 |
|     | 1    | 1    | 2     | 1 trt                                             |
|     | 1    | 0    | 2     | 1                                                 |
|     | 1    | 1    | 2     | 1                                                 |
|     | 1    | 1    | 2     | 1                                                 |
|     | 1    | 1    | 2     | 1                                                 |
|     | 1    | 1    | 2     | 1                                                 |
|     | 1    | 1    | 2     | 1                                                 |
|     | 1    | 0    | 2     | 1                                                 |
|     | 1    | 0    | 2     | 1                                                 |
|     | 2    | 1    | 2     | 1                                                 |
|     | 2    | 0    | 2     | 1 timepoint                                       |
|     | 2    | 1    | 2     | 1 1 = 6th learning trial                          |
|     | 2    | 1    | 2     | 1 2 = 10 mins later (short term memory)           |
|     | 2    | 1    | 2     | 1 3 = 24h later (long term memory)                |
|     | 2    | 1    | 2     | 1                                                 |
|     | 2    | 1    | 2     | 1                                                 |
|     | 2    | 0    | 2     | 1 response = did bee perform proboscis extension? |
|     | 1    | 1    | 2     | 1 1 = yes                                         |
|     | 1    | 0    | 2     | 1 0 = no                                          |
|     | 1    | 1    | 2     | 1                                                 |
|     | 1    | 0    | 2     | 1                                                 |
|     | 1    | 1    | 2     | 1                                                 |
|     | 1    | 1    | 2     | 1                                                 |
|     | 1    | 1    | 2     | 1                                                 |
|     | 1    | 1    | 2     | 1                                                 |
|     | 1    | 1    | 2     | 1                                                 |
|     | 1    | 0    | 2     | 1                                                 |
|     | 2    | 1    | 2     | 1                                                 |
|     | 2    | 0    | 2     | 1                                                 |
|     | 2    | 1    | 2     | 1                                                 |
|     | 2    | 1    | 2     | 1                                                 |
|     | 2    | 1    | 2     | 1                                                 |
|     | 2    | 1    | 2     | 1                                                 |
|     | 1    | 0    | 2     | 1                                                 |
|     | 1    | 1    | 2     | 1                                                 |
|     | 1    | 1    | 2     | 1                                                 |
|     | 1    | 0    | 2     | 1                                                 |
|     | 1    | 0    | 2     | 1                                                 |



|   |   |   |   |
|---|---|---|---|
| 2 | 1 | 3 | 1 |
| 2 |   | 3 | 1 |
| 2 | 1 | 3 | 1 |
| 2 | 1 | 3 | 1 |
| 2 | 1 | 3 | 1 |
| 2 | 1 | 3 | 1 |
| 2 | 0 | 3 | 1 |
| 2 | 0 | 3 | 1 |
| 1 | 1 | 3 | 1 |
| 1 | 1 | 3 | 1 |
| 1 | 1 | 3 | 1 |
| 1 | 0 | 3 | 1 |
| 1 | 0 | 3 | 1 |
| 1 | 0 | 3 | 1 |
| 1 | 1 | 3 | 1 |
| 1 | 0 | 3 | 1 |
| 1 | 0 | 3 | 1 |
| 2 | 1 | 3 | 1 |
| 2 | 0 | 3 | 1 |
| 2 | 1 | 3 | 1 |
| 2 | 0 | 3 | 1 |
| 2 | 0 | 3 | 1 |
| 2 | 1 | 3 | 1 |
| 1 | 0 | 3 | 1 |
| 1 | 0 | 3 | 1 |
| 1 | 1 | 3 | 1 |
| 1 | 0 | 3 | 1 |
| 1 | 1 | 3 | 1 |
| 1 | 0 | 3 | 1 |
| 1 | 1 | 3 | 1 |
| 2 | 0 | 3 | 1 |
| 2 | 0 | 3 | 1 |
| 2 | 1 | 3 | 1 |
| 2 | 1 | 3 | 1 |
| 2 | 1 | 3 | 1 |
| 1 | 0 | 3 | 2 |
| 1 | 0 | 3 | 2 |
| 1 | 0 | 3 | 2 |
| 1 | 1 | 3 | 2 |
| 1 | 1 | 3 | 2 |
| 1 | 1 | 3 | 2 |
| 1 | 0 | 3 | 2 |
| 1 | 0 | 3 | 2 |
| 1 | 0 | 3 | 2 |
| 1 | 1 | 3 | 2 |
| 1 | 1 | 3 | 2 |
| 1 | 1 | 3 | 2 |
| 2 | 0 | 3 | 2 |
| 2 | 0 | 3 | 2 |
| 2 | 1 | 3 | 2 |
| 2 | 1 | 3 | 2 |
| 2 | 0 | 3 | 2 |
| 2 | 1 | 3 | 2 |
| 2 | 0 | 3 | 2 |
| 2 | 0 | 3 | 2 |
| 1 | 1 | 3 | 2 |
| 1 | 1 | 3 | 2 |
| 1 | 1 | 3 | 2 |
| 1 | 0 | 3 | 2 |
| 1 | 0 | 3 | 2 |
| 1 | 0 | 3 | 2 |
| 1 | 1 | 3 | 2 |
| 1 | 0 | 3 | 2 |
| 1 | 0 | 3 | 2 |
| 2 | 0 | 3 | 2 |





**100ug acute data**

trt (treatment)

1 = sucrose fed control

2 = Hv1a/GNA

3 = benidipine HCl

4 = GNA

training trials of learning expt, T1-6

binary data shows did bee perform proboscis extension in response to odour?

1 = yes

0 = no

| trt | T1 | T2 | T3 | T4 | T5 | T6 |   |
|-----|----|----|----|----|----|----|---|
| 1   | 1  | 0  | 1  | 1  | 0  | 1  | 1 |
| 1   | 1  | 0  | 0  | 1  | 1  | 1  | 1 |
| 1   | 1  | 0  | 0  | 1  | 1  | 1  | 1 |
| 1   | 1  | 0  | 1  | 0  | 0  | 0  | 1 |
| 1   | 1  | 0  | 0  | 1  | 0  | 1  | 0 |
| 1   | 1  | 0  | 1  | 1  | 1  | 1  | 1 |
| 1   | 1  | 0  | 1  | 1  | 1  | 1  | 1 |
| 1   | 1  | 0  | 0  | 1  | 1  | 1  | 1 |
| 1   | 1  | 0  | 1  | 1  | 1  | 1  | 1 |
| 1   | 1  | 0  | 0  | 0  | 1  | 1  | 0 |
| 1   | 1  | 0  | 0  | 1  | 1  | 0  | 1 |
| 2   | 2  | 0  | 1  | 1  | 1  | 1  | 1 |
| 2   | 2  | 0  | 0  | 0  | 1  | 1  | 1 |
| 2   | 2  | 0  | 0  | 1  | 1  | 1  | 1 |
| 2   | 2  | 0  | 0  | 0  | 0  | 0  | 1 |
| 2   | 2  | 0  | 0  | 0  | 0  | 0  | 0 |
| 2   | 2  | 0  | 0  | 1  | 0  | 1  | 0 |
| 2   | 2  | 0  | 1  | 1  | 1  | 1  | 0 |
| 2   | 2  | 0  | 0  | 0  | 0  | 0  | 1 |
| 2   | 2  | 0  | 0  | 0  | 0  | 0  | 0 |
| 2   | 2  | 0  | 0  | 1  | 1  | 1  | 1 |
| 2   | 2  | 0  | 1  | 1  | 1  | 1  | 1 |
| 3   | 3  | 0  | 0  | 1  | 1  | 0  | 1 |
| 3   | 3  | 0  | 1  | 1  | 1  | 1  | 1 |
| 3   | 3  | 0  | 1  | 0  | 0  | 1  | 0 |
| 3   | 3  | 0  | 0  | 1  | 0  | 1  | 1 |
| 3   | 3  | 0  | 0  | 0  | 0  | 0  | 0 |
| 3   | 3  | 0  | 0  | 0  | 0  | 0  | 0 |
| 3   | 3  | 0  | 1  | 1  | 0  | 0  | 1 |
| 3   | 3  | 0  | 0  | 0  | 0  | 0  | 1 |
| 3   | 3  | 0  | 0  | 0  | 1  | 0  | 0 |
| 3   | 3  | 0  | 0  | 0  | 0  | 1  | 0 |
| 3   | 3  | 0  | 1  | 0  | 1  | 0  | 1 |
| 3   | 3  | 0  | 0  | 0  | 1  | 0  | 0 |
| 3   | 3  | 0  | 0  | 0  | 0  | 0  | 0 |
| 4   | 4  | 0  | 1  | 1  | 1  | 1  | 0 |
| 4   | 4  | 0  | 1  | 1  | 1  | 1  | 1 |
| 4   | 4  | 0  | 0  | 0  | 0  | 0  | 0 |
| 4   | 4  | 0  | 0  | 1  | 1  | 1  | 1 |
| 4   | 4  | 0  | 0  | 1  | 1  | 0  | 1 |
| 4   | 4  | 0  | 1  | 0  | 0  | 0  | 0 |
| 4   | 4  | 0  | 0  | 0  | 1  | 1  | 1 |
| 4   | 4  | 0  | 0  | 0  | 1  | 1  | 1 |
| 4   | 4  | 0  | 0  | 1  | 0  | 1  | 1 |
| 4   | 4  | 0  | 0  | 0  | 0  | 1  | 1 |
| 4   | 4  | 0  | 1  | 1  | 1  | 1  | 1 |
| 4   | 4  | 0  | 1  | 1  | 1  | 1  | 1 |
| 4   | 4  | 0  | 1  | 1  | 1  | 1  | 1 |
| 4   | 4  | 0  | 1  | 1  | 1  | 0  | 1 |

|   |   |   |   |   |   |   |
|---|---|---|---|---|---|---|
| 4 | 0 | 0 | 0 | 0 | 1 | 1 |
| 1 | 0 | 0 | 1 | 1 | 1 | 1 |
| 1 | 0 | 1 | 1 | 1 | 1 | 1 |
| 1 | 0 | 1 | 1 | 1 | 1 | 1 |
| 1 | 0 | 0 | 1 | 1 | 1 | 1 |
| 1 | 0 | 1 | 1 | 1 | 1 | 1 |
| 1 | 0 | 0 | 1 | 0 | 0 | 0 |
| 1 | 0 | 0 | 0 | 0 | 1 | 1 |
| 1 | 0 | 0 | 0 | 0 | 0 | 0 |
| 2 | 0 | 0 | 1 | 1 | 1 | 1 |
| 2 | 0 | 0 | 0 | 0 | 1 | 1 |
| 2 | 0 | 1 | 1 | 1 | 1 | 1 |
| 2 | 0 | 0 | 1 | 1 | 1 | 1 |
| 2 | 0 | 0 | 0 | 0 | 0 | 0 |
| 2 | 0 | 1 | 1 | 1 | 1 | 1 |
| 2 | 0 | 1 | 1 | 1 | 1 | 1 |
| 2 | 0 | 0 | 1 | 1 | 1 | 1 |
| 4 | 0 | 0 | 0 | 0 | 0 | 0 |
| 4 | 0 | 0 | 1 | 1 | 1 | 1 |
| 4 | 0 | 0 | 1 | 1 | 1 | 1 |
| 4 | 0 | 1 | 1 | 1 | 1 | 1 |
| 4 | 0 | 1 | 1 | 1 | 1 | 1 |
| 4 | 0 | 1 | 1 | 1 | 1 | 1 |
| 4 | 0 | 1 | 1 | 1 | 1 | 1 |
| 4 | 0 | 0 | 1 | 0 | 0 | 0 |
| 4 | 0 | 0 | 1 | 1 | 1 | 1 |
| 4 | 0 | 0 | 1 | 1 | 1 | 1 |
| 3 | 0 | 0 | 0 | 0 | 1 | 1 |
| 3 | 0 | 0 | 0 | 0 | 0 | 0 |
| 3 | 0 | 0 | 1 | 1 | 1 | 1 |
| 3 | 0 | 0 | 1 | 0 | 1 | 0 |
| 3 | 0 | 0 | 0 | 0 | 0 | 0 |
| 3 | 0 | 0 | 0 | 0 | 0 | 1 |
| 3 | 0 | 1 | 1 | 1 | 1 | 1 |
| 3 | 0 | 0 | 1 | 1 | 1 | 0 |
| 3 | 0 | 0 | 1 | 0 | 1 | 1 |
| 3 | 0 | 0 | 0 | 0 | 0 | 0 |

| trt | Response | timepoint | odour | 100ug acute memory                                |
|-----|----------|-----------|-------|---------------------------------------------------|
| 1   | 1        | 1         | 1     | 1 trt (treatment)                                 |
| 1   | 1        | 1         | 1     | 1 1 = sucrose fed control                         |
| 1   | 1        | 1         | 1     | 1 2 = Hv1a/GNA                                    |
| 1   | 1        | 1         | 1     | 1 3 = benidipine HCl                              |
| 1   | 0        | 1         | 1     | 1 4 = GNA                                         |
| 1   | 1        | 1         | 1     | 1                                                 |
| 1   | 1        | 1         | 1     | 1 odour                                           |
| 1   | 1        | 1         | 1     | 1 1 = hexanol (trained odour)                     |
| 1   | 1        | 1         | 1     | 1 2 = octanol (novel odour)                       |
| 1   | 0        | 1         | 1     | 1                                                 |
| 1   | 1        | 1         | 1     | 1                                                 |
| 2   | 1        | 1         | 1     | 1 timepoint                                       |
| 2   | 1        | 1         | 1     | 1 1 = 6th learning trial                          |
| 2   | 1        | 1         | 1     | 1 2 = 10 mins later (short term memory)           |
| 2   | 1        | 1         | 1     | 1 3 = 24h later (long term memory)                |
| 2   | 0        | 1         | 1     | 1                                                 |
| 2   | 0        | 1         | 1     | 1                                                 |
| 2   | 0        | 1         | 1     | 1 response = did bee perform proboscis extension? |
| 2   | 1        | 1         | 1     | 1 1 = yes                                         |
| 2   | 0        | 1         | 1     | 1 0 = no                                          |
| 2   | 1        | 1         | 1     | 1                                                 |
| 2   | 1        | 1         | 1     | 1                                                 |
| 3   | 1        | 1         | 1     | 1                                                 |

|   |   |   |   |
|---|---|---|---|
| 3 | 1 | 1 | 1 |
| 3 | 0 | 1 | 1 |
| 3 | 1 | 1 | 1 |
| 3 | 0 | 1 | 1 |
| 3 | 0 | 1 | 1 |
| 3 | 1 | 1 | 1 |
| 3 | 1 | 1 | 1 |
| 3 | 0 | 1 | 1 |
| 3 | 0 | 1 | 1 |
| 3 | 1 | 1 | 1 |
| 3 | 0 | 1 | 1 |
| 3 | 0 | 1 | 1 |
| 4 | 0 | 1 | 1 |
| 4 | 1 | 1 | 1 |
| 4 | 0 | 1 | 1 |
| 4 | 1 | 1 | 1 |
| 4 | 1 | 1 | 1 |
| 4 | 1 | 1 | 1 |
| 4 | 0 | 1 | 1 |
| 4 | 1 | 1 | 1 |
| 4 | 1 | 1 | 1 |
| 4 | 1 | 1 | 1 |
| 4 | 1 | 1 | 1 |
| 4 | 1 | 1 | 1 |
| 4 | 1 | 1 | 1 |
| 4 | 1 | 1 | 1 |
| 4 | 1 | 1 | 1 |
| 4 | 1 | 1 | 1 |
| 4 | 1 | 1 | 1 |
| 4 | 1 | 1 | 1 |
| 4 | 1 | 1 | 1 |
| 4 | 1 | 1 | 1 |
| 4 | 1 | 1 | 1 |
| 4 | 1 | 1 | 1 |
| 4 | 1 | 1 | 1 |
| 4 | 0 | 1 | 1 |
| 4 | 1 | 1 | 1 |
| 4 | 1 | 1 | 1 |
| 4 | 1 | 1 | 1 |
| 4 | 1 | 1 | 1 |
| 4 | 1 | 1 | 1 |
| 4 | 1 | 1 | 1 |
| 4 | 1 | 1 | 1 |
| 4 | 1 | 1 | 1 |
| 4 | 1 | 1 | 1 |
| 4 | 0 | 1 | 1 |
| 4 | 1 | 1 | 1 |
| 4 | 1 | 1 | 1 |
| 4 | 1 | 1 | 1 |
| 4 | 1 | 1 | 1 |
| 4 | 1 | 1 | 1 |
| 4 | 1 | 1 | 1 |
| 4 | 1 | 1 | 1 |
| 4 | 1 | 1 | 1 |
| 4 | 1 | 1 | 1 |
| 4 | 1 | 1 | 1 |
| 4 | 1 | 1 | 1 |
| 4 | 1 | 1 | 1 |
| 3 | 1 | 1 | 1 |
| 3 | 0 | 1 | 1 |
| 3 | 1 | 1 | 1 |
| 3 | 0 | 1 | 1 |
| 3 | 0 | 1 | 1 |
| 3 | 1 | 1 | 1 |
| 3 | 1 | 1 | 1 |
| 3 | 0 | 1 | 1 |
| 3 | 1 | 1 | 1 |
| 3 | 1 | 1 | 1 |
| 3 | 0 | 1 | 1 |
| 3 | 1 | 1 | 1 |
| 3 | 0 | 1 | 1 |
| 1 | 0 | 2 | 1 |
| 1 | 1 | 2 | 1 |
| 1 | 1 | 2 | 1 |

|   |   |   |   |
|---|---|---|---|
| 1 | 0 | 2 | 1 |
| 1 | 0 | 2 | 1 |
| 1 | 1 | 2 | 1 |
| 1 | 1 | 2 | 1 |
| 1 | 1 | 2 | 1 |
| 1 | 1 | 2 | 1 |
| 1 | 0 | 2 | 1 |
| 1 | 0 | 2 | 1 |
| 2 | 1 | 2 | 1 |
| 2 | 1 | 2 | 1 |
| 2 | 1 | 2 | 1 |
| 2 | 0 | 2 | 1 |
| 2 | 0 | 2 | 1 |
| 2 | 0 | 2 | 1 |
| 2 | 0 | 2 | 1 |
| 2 | 0 | 2 | 1 |
| 2 | 1 | 2 | 1 |
| 2 | 1 | 2 | 1 |
| 3 | 0 | 2 | 1 |
| 3 | 1 | 2 | 1 |
| 3 | 0 | 2 | 1 |
| 3 | 1 | 2 | 1 |
| 3 | 0 | 2 | 1 |
| 3 | 1 | 2 | 1 |
| 3 | 0 | 2 | 1 |
| 3 | 0 | 2 | 1 |
| 3 | 0 | 2 | 1 |
| 3 | 0 | 2 | 1 |
| 3 | 0 | 2 | 1 |
| 3 | 0 | 2 | 1 |
| 3 | 0 | 2 | 1 |
| 3 | 0 | 2 | 1 |
| 4 | 0 | 2 | 1 |
| 4 | 1 | 2 | 1 |
| 4 | 0 | 2 | 1 |
| 4 | 1 | 2 | 1 |
| 4 | 1 | 2 | 1 |
| 4 | 0 | 2 | 1 |
| 4 | 1 | 2 | 1 |
| 4 | 1 | 2 | 1 |
| 4 | 0 | 2 | 1 |
| 4 | 1 | 2 | 1 |
| 4 | 1 | 2 | 1 |
| 4 | 1 | 2 | 1 |
| 4 | 1 | 2 | 1 |
| 1 | 1 | 2 | 1 |
| 1 | 1 | 2 | 1 |
| 1 | 1 | 2 | 1 |
| 1 | 1 | 2 | 1 |
| 1 | 1 | 2 | 1 |
| 1 | 1 | 2 | 1 |
| 1 | 0 | 2 | 1 |
| 1 | 0 | 2 | 1 |
| 2 | 1 | 2 | 1 |
| 2 | 1 | 2 | 1 |
| 2 | 0 | 2 | 1 |
| 2 | 1 | 2 | 1 |
| 2 | 0 | 2 | 1 |
| 2 | 1 | 2 | 1 |
| 2 | 1 | 2 | 1 |
| 2 | 1 | 2 | 1 |
| 4 | 0 | 2 | 1 |
| 4 | 1 | 2 | 1 |
| 4 | 1 | 2 | 1 |

|   |   |   |   |
|---|---|---|---|
| 4 | 1 | 2 | 1 |
| 4 | 0 | 2 | 1 |
| 4 | 0 | 2 | 1 |
| 4 | 1 | 2 | 1 |
| 4 | 0 | 2 | 1 |
| 4 | 0 | 2 | 1 |
| 4 | 1 | 2 | 1 |
| 3 | 1 | 2 | 1 |
| 3 | 0 | 2 | 1 |
| 3 | 1 | 2 | 1 |
| 3 | 0 | 2 | 1 |
| 3 | 0 | 2 | 1 |
| 3 | 1 | 2 | 1 |
| 3 | 0 | 2 | 1 |
| 3 | 1 | 2 | 1 |
| 3 | 0 | 2 | 1 |
| 1 | 0 | 2 | 2 |
| 1 | 0 | 2 | 2 |
| 1 | 0 | 2 | 2 |
| 1 | 0 | 2 | 2 |
| 1 | 0 | 2 | 2 |
| 1 | 0 | 2 | 2 |
| 1 | 0 | 2 | 2 |
| 1 | 0 | 2 | 2 |
| 1 | 0 | 2 | 2 |
| 1 | 0 | 2 | 2 |
| 1 | 0 | 2 | 2 |
| 1 | 0 | 2 | 2 |
| 1 | 0 | 2 | 2 |
| 1 | 0 | 2 | 2 |
| 1 | 0 | 2 | 2 |
| 1 | 0 | 2 | 2 |
| 2 | 0 | 2 | 2 |
| 2 | 0 | 2 | 2 |
| 2 | 1 | 2 | 2 |
| 2 | 0 | 2 | 2 |
| 2 | 0 | 2 | 2 |
| 2 | 0 | 2 | 2 |
| 2 | 0 | 2 | 2 |
| 2 | 0 | 2 | 2 |
| 2 | 0 | 2 | 2 |
| 2 | 0 | 2 | 2 |
| 2 | 1 | 2 | 2 |
| 3 | 0 | 2 | 2 |
| 3 | 0 | 2 | 2 |
| 3 | 0 | 2 | 2 |
| 3 | 0 | 2 | 2 |
| 3 | 0 | 2 | 2 |
| 3 | 0 | 2 | 2 |
| 3 | 0 | 2 | 2 |
| 3 | 0 | 2 | 2 |
| 3 | 0 | 2 | 2 |
| 3 | 0 | 2 | 2 |
| 3 | 0 | 2 | 2 |
| 4 | 0 | 2 | 2 |
| 4 | 1 | 2 | 2 |
| 4 | 0 | 2 | 2 |
| 4 | 1 | 2 | 2 |
| 4 | 1 | 2 | 2 |
| 4 | 0 | 2 | 2 |
| 4 | 1 | 2 | 2 |
| 4 | 0 | 2 | 2 |
| 4 | 1 | 2 | 2 |
| 4 | 1 | 2 | 2 |
| 4 | 0 | 2 | 2 |
| 4 | 0 | 2 | 2 |

|   |   |   |   |
|---|---|---|---|
| 4 | 1 | 2 | 2 |
| 1 | 1 | 2 | 2 |
| 1 | 1 | 2 | 2 |
| 1 | 0 | 2 | 2 |
| 1 | 0 | 2 | 2 |
| 1 | 1 | 2 | 2 |
| 1 | 0 | 2 | 2 |
| 1 | 0 | 2 | 2 |
| 1 | 0 | 2 | 2 |
| 2 | 0 | 2 | 2 |
| 2 | 0 | 2 | 2 |
| 2 | 0 | 2 | 2 |
| 2 | 1 | 2 | 2 |
| 2 | 0 | 2 | 2 |
| 2 | 0 | 2 | 2 |
| 2 | 1 | 2 | 2 |
| 2 | 0 | 2 | 2 |
| 4 | 0 | 2 | 2 |
| 4 | 0 | 2 | 2 |
| 4 | 0 | 2 | 2 |
| 4 | 0 | 2 | 2 |
| 4 | 0 | 2 | 2 |
| 4 | 0 | 2 | 2 |
| 4 | 1 | 2 | 2 |
| 4 | 0 | 2 | 2 |
| 4 | 0 | 2 | 2 |
| 4 | 0 | 2 | 2 |
| 3 | 0 | 2 | 2 |
| 3 | 0 | 2 | 2 |
| 3 | 0 | 2 | 2 |
| 3 | 0 | 2 | 2 |
| 3 | 0 | 2 | 2 |
| 3 | 1 | 2 | 2 |
| 3 | 0 | 2 | 2 |
| 3 | 0 | 2 | 2 |
| 3 | 0 | 2 | 2 |
| 1 | 1 | 3 | 1 |
| 1 | 0 | 3 | 1 |
| 1 | 0 | 3 | 1 |
| 1 | 1 | 3 | 1 |
| 1 | 1 | 3 | 1 |
| 1 | 1 | 3 | 1 |
| 1 | 1 | 3 | 1 |
| 1 | 0 | 3 | 1 |
| 1 | 1 | 3 | 1 |
| 1 | 1 | 3 | 1 |
| 1 | 1 | 3 | 1 |
| 2 | 1 | 3 | 1 |
| 2 | 1 | 3 | 1 |
| 2 | 0 | 3 | 1 |
| 2 | 0 | 3 | 1 |
| 2 | 0 | 3 | 1 |
| 2 | 0 | 3 | 1 |
| 2 | 0 | 3 | 1 |
| 2 | 0 | 3 | 1 |
| 2 | 1 | 3 | 1 |
| 2 | 0 | 3 | 1 |
| 2 | 1 | 3 | 1 |
| 3 | 1 | 3 | 1 |
| 3 | 0 | 3 | 1 |
| 3 | 1 | 3 | 1 |
| 3 | 1 | 3 | 1 |
| 3 | 0 | 3 | 1 |

|   |   |   |   |
|---|---|---|---|
| 3 | 0 | 3 | 1 |
| 3 | 0 | 3 | 1 |
| 3 |   | 3 | 1 |
| 3 |   | 3 | 1 |
| 3 |   | 3 | 1 |
| 3 |   | 3 | 1 |
| 3 |   | 3 | 1 |
| 3 |   | 3 | 1 |
| 4 | 0 | 3 | 1 |
| 4 | 1 | 3 | 1 |
| 4 | 0 | 3 | 1 |
| 4 | 1 | 3 | 1 |
| 4 | 1 | 3 | 1 |
| 4 | 0 | 3 | 1 |
| 4 | 1 | 3 | 1 |
| 4 | 1 | 3 | 1 |
| 4 | 0 | 3 | 1 |
| 4 | 1 | 3 | 1 |
| 4 | 1 | 3 | 1 |
| 1 | 1 | 3 | 1 |
| 1 | 0 | 3 | 1 |
| 1 | 1 | 3 | 1 |
| 1 | 0 | 3 | 1 |
| 1 | 0 | 3 | 1 |
| 1 | 1 | 3 | 1 |
| 1 |   | 3 | 1 |
| 1 |   | 3 | 1 |
| 2 | 0 | 3 | 1 |
| 2 | 1 | 3 | 1 |
| 2 | 0 | 3 | 1 |
| 2 | 0 | 3 | 1 |
| 2 | 0 | 3 | 1 |
| 2 | 1 | 3 | 1 |
| 2 | 1 | 3 | 1 |
| 2 |   | 3 | 1 |
| 4 | 0 | 3 | 1 |
| 4 | 1 | 3 | 1 |
| 4 | 1 | 3 | 1 |
| 4 | 1 | 3 | 1 |
| 4 | 1 | 3 | 1 |
| 4 | 0 | 3 | 1 |
| 4 | 0 | 3 | 1 |
| 4 | 1 | 3 | 1 |
| 4 |   | 3 | 1 |
| 4 |   | 3 | 1 |
| 3 | 1 | 3 | 1 |
| 3 | 1 | 3 | 1 |
| 3 | 1 | 3 | 1 |
| 3 | 1 | 3 | 1 |
| 3 | 0 | 3 | 1 |
| 3 | 0 | 3 | 1 |
| 3 | 1 | 3 | 1 |
| 3 | 0 | 3 | 1 |
| 3 | 1 | 3 | 1 |
| 3 | 0 | 3 | 1 |
| 1 | 0 | 3 | 2 |
| 1 | 0 | 3 | 2 |
| 1 | 0 | 3 | 2 |
| 1 | 0 | 3 | 2 |
| 1 | 0 | 3 | 2 |
| 1 | 1 | 3 | 2 |
| 1 | 1 | 3 | 2 |

|   |   |   |   |
|---|---|---|---|
| 1 | 0 | 3 | 2 |
| 1 | 1 | 3 | 2 |
| 1 | 1 | 3 | 2 |
| 1 |   | 3 | 2 |
| 2 | 0 | 3 | 2 |
| 2 | 0 | 3 | 2 |
| 2 | 0 | 3 | 2 |
| 2 | 0 | 3 | 2 |
| 2 | 0 | 3 | 2 |
| 2 | 0 | 3 | 2 |
| 2 | 1 | 3 | 2 |
| 2 | 0 | 3 | 2 |
| 2 | 0 | 3 | 2 |
| 2 | 0 | 3 | 2 |
| 3 | 0 | 3 | 2 |
| 3 | 0 | 3 | 2 |
| 3 | 0 | 3 | 2 |
| 3 | 0 | 3 | 2 |
| 3 | 0 | 3 | 2 |
| 3 | 0 | 3 | 2 |
| 3 | 0 | 3 | 2 |
| 3 | 0 | 3 | 2 |
| 3 |   | 3 | 2 |
| 3 |   | 3 | 2 |
| 3 |   | 3 | 2 |
| 3 |   | 3 | 2 |
| 3 |   | 3 | 2 |
| 3 |   | 3 | 2 |
| 4 | 0 | 3 | 2 |
| 4 | 1 | 3 | 2 |
| 4 | 0 | 3 | 2 |
| 4 | 1 | 3 | 2 |
| 4 | 0 | 3 | 2 |
| 4 | 0 | 3 | 2 |
| 4 | 1 | 3 | 2 |
| 4 | 0 | 3 | 2 |
| 4 | 1 | 3 | 2 |
| 4 | 1 | 3 | 2 |
| 4 | 1 | 3 | 2 |
| 4 | 1 | 3 | 2 |
| 4 | 0 | 3 | 2 |
| 1 | 0 | 3 | 2 |
| 1 | 0 | 3 | 2 |
| 1 | 0 | 3 | 2 |
| 1 | 0 | 3 | 2 |
| 1 | 1 | 3 | 2 |
| 1 |   | 3 | 2 |
| 1 |   | 3 | 2 |
| 2 | 1 | 3 | 2 |
| 2 | 0 | 3 | 2 |
| 2 | 0 | 3 | 2 |
| 2 | 0 | 3 | 2 |
| 2 | 0 | 3 | 2 |
| 2 | 1 | 3 | 2 |
| 2 | 0 | 3 | 2 |
| 2 |   | 3 | 2 |
| 4 | 0 | 3 | 2 |
| 4 | 0 | 3 | 2 |
| 4 | 0 | 3 | 2 |
| 4 | 1 | 3 | 2 |
| 4 | 0 | 3 | 2 |
| 4 | 0 | 3 | 2 |
| 4 | 0 | 3 | 2 |









| <b>Oral</b> | ctrl time | ctrl status | gna time | gna status |
|-------------|-----------|-------------|----------|------------|
|             | 4         | 1           | 24       | 1          |
|             | 4         | 1           | 24       | 1          |
|             | 48        | 0           | 48       | 1          |
|             | 48        | 0           | 48       | 1          |
|             | 48        | 0           | 48       | 1          |
|             | 48        | 0           | 48       | 1          |
|             | 48        | 0           | 48       | 1          |
|             | 48        | 0           | 48       | 1          |
|             | 48        | 0           | 48       | 1          |
|             | 48        | 0           | 48       | 1          |
|             | 48        | 0           | 48       | 1          |
|             | 48        | 0           | 48       | 1          |
|             | 48        | 0           | 48       | 1          |
|             | 48        | 0           | 48       | 1          |
|             | 48        | 0           | 48       | 1          |
|             | 48        | 0           | 48       | 1          |
|             | 48        | 0           | 48       | 1          |
|             | 48        | 0           | 48       | 1          |
|             | 48        | 0           | 48       | 1          |
|             | 48        | 0           | 48       | 1          |
|             | 48        | 0           | 48       | 0          |
|             | 48        | 0           | 48       | 0          |
|             | 48        | 0           | 48       | 0          |
|             | 48        | 0           | 48       | 0          |
|             | 48        | 0           | 48       | 0          |
|             | 48        | 0           | 48       | 0          |
|             | 48        | 0           | 48       | 0          |
|             | 48        | 0           | 48       | 0          |
|             | 48        | 0           | 48       | 0          |
|             | 48        | 0           | 48       | 0          |
|             | 48        | 0           | 48       | 0          |
|             | 48        | 0           | 48       | 0          |
|             | 48        | 0           | 48       | 0          |
|             | 48        | 0           | 48       | 0          |
|             | 48        | 0           | 48       | 0          |
|             | 48        | 0           | 48       | 0          |
|             | 48        | 0           | 48       | 0          |
|             | 48        | 0           | 48       | 0          |
|             | 48        | 0           | 48       | 0          |
|             | 48        | 0           | 48       | 0          |
|             | 48        | 0           | 48       | 0          |
|             | 48        | 0           | 48       | 0          |
|             | 48        | 0           | 48       | 0          |
|             | 48        | 0           | 48       | 0          |
|             | 48        | 0           | 48       | 0          |
|             | 48        | 0           | 48       | 0          |
|             | 48        | 0           | 48       | 0          |
|             | 48        | 0           | 48       | 0          |
|             | 48        | 0           | 48       | 0          |
|             | 48        | 0           | 48       | 0          |
|             | 48        | 0           | 48       | 0          |
|             | 48        | 0           | 48       | 0          |
|             | 48        | 0           | 48       | 0          |
|             | 48        | 0           | 48       | 0          |
|             | 48        | 0           | 48       | 0          |
|             | 48        | 0           | 48       | 0          |
|             | 48        | 0           | 48       | 0          |
|             | 48        | 0           | 48       | 0          |

Hv1a/GNA time Hv1a/GNA statu acet 14 time acet 14 status

|    |   |    |   |
|----|---|----|---|
| 4  | 1 | 4  | 1 |
| 4  | 1 | 4  | 1 |
| 4  | 1 | 4  | 1 |
| 4  | 1 | 4  | 1 |
| 48 | 1 | 4  | 1 |
| 48 | 1 | 4  | 1 |
| 48 | 1 | 4  | 1 |
| 48 | 1 | 4  | 1 |
| 48 | 1 | 4  | 1 |
| 48 | 1 | 4  | 1 |
| 48 | 1 | 4  | 1 |
| 48 | 1 | 4  | 1 |
| 48 | 0 | 4  | 1 |
| 48 | 0 | 4  | 1 |
| 48 | 0 | 4  | 1 |
| 48 | 0 | 4  | 1 |
| 48 | 0 | 4  | 1 |
| 48 | 0 | 4  | 1 |
| 48 | 0 | 4  | 1 |
| 48 | 0 | 4  | 1 |
| 48 | 0 | 4  | 1 |
| 48 | 0 | 24 | 1 |
| 48 | 0 | 24 | 1 |
| 48 | 0 | 24 | 1 |
| 48 | 0 | 24 | 1 |
| 48 | 0 | 24 | 1 |
| 48 | 0 | 24 | 1 |
| 48 | 0 | 24 | 1 |
| 48 | 0 | 24 | 1 |
| 48 | 0 | 24 | 1 |
| 48 | 0 | 24 | 1 |
| 48 | 0 | 48 | 0 |
| 48 | 0 | 48 | 0 |
| 48 | 0 | 48 | 0 |
| 48 | 0 | 48 | 0 |
| 48 | 0 | 48 | 0 |
| 48 | 0 | 48 | 0 |
| 48 | 0 | 48 | 0 |
| 48 | 0 | 48 | 0 |
| 48 | 0 | 48 | 0 |
| 48 | 0 | 48 | 0 |
| 48 | 0 | 48 | 0 |
| 48 | 0 | 48 | 0 |
| 48 | 0 | 48 | 0 |
| 48 | 0 | 48 | 0 |
| 48 | 0 | 48 | 0 |
| 48 | 0 | 48 | 0 |
| 48 | 0 | 48 | 0 |
| 48 | 0 | 48 | 0 |
| 48 | 0 | 48 | 0 |
| 48 | 0 | 48 | 0 |
| 48 | 0 | 48 | 0 |
| 48 | 0 | 48 | 0 |
| 48 | 0 | 48 | 0 |
| 48 | 0 | 48 | 0 |
| 48 | 0 | 48 | 0 |

| <b>Injection</b> | ctrl time | ctrl status | gna time | gna status |
|------------------|-----------|-------------|----------|------------|
|                  | 48        | 0           | 4        | 1          |
|                  | 48        | 0           | 24       | 1          |
